# Supplementary material for: Public concerns over presumed metal and radionuclide pollution: testing a possible link to ovine hepatic melanosis in South Greenland
Source: Environ Monit Assess. 2026 Jan 22;198(2):161. doi: 10.1007/s10661-025-14945-z (PMC12823691; doi:10.1007/s10661-025-14945-z)
Supplement: Supplementary file 1 — (XLSX 44.7 KB) [file 10661_2025_14945_MOESM1_ESM.xlsx]

## Sheet: ValueList_Helper
Bkgnd
BlkVrfy
CalBlk
CalStd
CICSpike
DilStd
DriftChk
FQBlk
IsoStd
QC1
QC2
QC3
QC4
QC5
Sample
Spike
Spike Ref
SQBlk
SQISTD
SQStd

## Sheet: ICP-MS data paper
		Table QQQ. Concentrations in mg kg-1 wet weight. 1 g of wet subsample is used. Grayed lines are duplicates.
		ID no.	Sample	Tissue type	Dry matter%	Li	Be	Na	Mg	Al	P	K	Ca	Sc	Ti	V	Cr	Mn	Fe	Co	Ni	Cu	Zn	Ga	As	Se	Rb	Sr	Y	Zr	Nb	Mo	Ru	Pd	Ag	Cd	Sb	Te	Cs	Ba	La	Ce	Pr	Nd	Sm	Eu	Gd	Tb	Dy
		Detection limit (DL) (3 SD on blanks)				0.0027451	0.00139033	25.3703	0.248791	0.843247	3.67509	1.67825	1.17871	0.000825036	0.0257733	0.000622285	0.00645771	0.0019038	0.104385	9.38786e-05	0.00512411	0.00662258	0.0658092	0.000358713	0.00285556	0.000539434	0.00152119	0.00794478	0.000306896	0.0183644	0.000650105	0.000980264	2.40897e-05	4.7979e-05	0.000126414	6.54329e-05	0.000740085	0.000411555	0.000875657	0.012415	0.000166859	0.000187039	4.44471e-05	9.41191e-05	7.76934e-06	1.31444e-05	4.29735e-05	1.03324e-05	1.56805e-05
		Sort 1	lamb	black liver	ND	0.00381718	<DL	612.61	162.831	<DL	4390.73	2617.63	44.8952	<DL	0.142833	<DL	<DL	3.03957	50.0976	0.0310526	0.00607658	74.1509	30.3985	<DL	0.00561448	0.165225	19.9918	0.210194	<DL	<DL	<DL	1.04028	<DL	7.18274e-05	0.873156	0.167588	<DL	<DL	0.0725411	0.19663	0.000960631	0.000910011	0.000104376	0.000276201	4.82166e-05	2.34454e-05	<DL	<DL	<DL
		Sort 2	lamb	black liver	ND	<DL	<DL	593.707	159.347	<DL	4062.85	2551.63	43.2026	<DL	0.1425	<DL	0.0265298	2.57161	48.5735	0.0442093	<DL	32.0757	31.1712	<DL	<DL	0.124816	13.2922	0.166482	<DL	<DL	0.000657829	1.50062	<DL	6.50059e-05	0.463015	0.137682	<DL	<DL	0.0921823	0.171682	0.00254093	0.00199603	0.000260112	0.000746176	7.02691e-05	2.05777e-05	<DL	<DL	<DL
		Sort 3	lamb	black liver	ND	0.00333164	<DL	839.342	157.23	<DL	4234.95	2290.49	45.8929	<DL	0.136599	0.000854464	<DL	3.47448	65.2038	0.0360041	0.0546071	35.1041	30.5499	<DL	<DL	0.0472695	14.3749	0.180052	<DL	<DL	<DL	1.20367	<DL	<DL	0.405717	0.13161	<DL	<DL	0.0851833	0.26487	0.00347404	0.00425747	0.000424043	0.0014015	0.000171155	3.98088e-05	5.31649e-05	<DL	<DL
		Sort 4	lamb	black liver	ND	0.00401645	<DL	798.379	161.715	<DL	4343.12	2636.65	49.9472	<DL	0.168577	0.000709296	<DL	3.13982	65.0273	0.0700879	<DL	6.22263	31.5012	0.00050044	<DL	0.0507726	16.5632	0.212437	<DL	0.0190104	<DL	1.18979	<DL	4.81133e-05	0.14192	0.0779778	<DL	<DL	0.0395448	0.30028	0.00638898	0.00724096	0.000772955	0.00274726	0.000372941	7.62994e-05	0.000137503	1.50783e-05	4.58326e-05
		Sort 5	lamb	black liver	ND	0.00470555	<DL	688.502	163.627	<DL	4544.4	2656.94	41.1456	<DL	0.17672	0.000700975	<DL	2.87933	77.3528	0.034309	<DL	40.928	31.504	<DL	<DL	0.0827217	19.8421	0.153554	<DL	0.0194835	<DL	0.972976	<DL	<DL	0.184661	0.268864	<DL	<DL	0.0625662	0.260133	0.00229341	0.00192619	0.000218792	0.000615219	0.000103156	2.50392e-05	6.88033e-05	<DL	<DL
		Sort 6	lamb	black liver	ND	0.00668167	<DL	612.578	182.464	<DL	4878.79	2698.77	52.2069	<DL	0.202295	<DL	0.0313599	2.49448	69.7403	0.0433013	0.00582688	25.9139	32.0966	0.000739611	<DL	0.0493263	10.7206	0.130752	<DL	0.0192125	0.000727936	1.24655	<DL	<DL	0.228681	0.0454297	<DL	<DL	0.0998725	0.085448	0.00660525	0.00733883	0.000770519	0.00260218	0.000255058	2.27708e-05	9.98465e-05	1.35037e-05	2.52401e-05
		Sort 6	lamb	black liver	ND	0.00717568	<DL	604.887	185.271	<DL	4931.76	2747.33	54.2485	<DL	0.209174	0.00127958	<DL	2.50446	68.5427	0.043399	<DL	25.504	32.6812	0.000686984	<DL	0.0523865	10.9339	0.146835	<DL	<DL	<DL	1.25335	<DL	<DL	0.227566	0.0455324	<DL	<DL	0.101593	0.0957473	0.00701368	0.00761537	0.000841503	0.00252235	0.000252326	2.97546e-05	0.00010235	1.53873e-05	2.66184e-05
		Sort 7	lamb	black liver	ND	0.00333669	<DL	932.496	158.72	<DL	4216.57	2367.73	52.3515	<DL	0.185647	0.000622775	0.0101355	3.17644	56.6684	0.0360446	<DL	26.4203	26.6444	0.000679651	<DL	0.0769631	13.992	0.141699	<DL	<DL	<DL	0.907867	<DL	<DL	0.191406	0.0587137	<DL	<DL	0.120953	0.203264	0.00542583	0.00530642	0.000541708	0.0015578	0.000147681	2.75238e-05	7.64661e-05	<DL	3.29552e-05
		Sort 8	lamb	black liver	ND	0.00332429	<DL	778.677	162.317	<DL	4835.97	2650.2	45.0103	<DL	0.239318	<DL	0.0631752	3.14888	49.0205	0.0391965	0.0133469	12.386	29.2484	0.000662563	<DL	0.0701244	22.4265	0.113539	<DL	0.0205366	0.00100354	1.37548	<DL	<DL	0.0186158	0.0932916	<DL	<DL	0.0288563	0.100808	0.00298006	0.00220913	0.000269514	0.000834697	8.99774e-05	1.74174e-05	<DL	<DL	2.22719e-05
		Sort 9	lamb	black liver	ND	0.00724547	<DL	916.954	159.092	<DL	4459.1	2397.52	48.9775	<DL	0.201569	0.000963595	<DL	2.19395	61.7533	0.0288	<DL	42.3981	26.1721	0.000516353	<DL	0.0791946	8.68299	0.143464	<DL	<DL	<DL	1.25299	<DL	<DL	0.488989	0.268211	<DL	<DL	0.0163571	0.124112	0.00718442	0.00771417	0.00076876	0.00260454	0.000247593	2.63224e-05	0.000135244	1.62864e-05	<DL
		Sort 10	lamb	black liver	ND	0.00493124	<DL	696.872	167.292	<DL	5111.79	2611.93	57.4547	<DL	0.233929	0.00178211	<DL	3.07643	59.6318	0.053836	<DL	46.1036	30.3742	0.000701541	<DL	0.0651505	23.8321	0.16388	<DL	<DL	<DL	1.14526	<DL	<DL	0.105873	0.0604792	<DL	0.000429649	0.0579749	0.136201	0.0055833	0.00624184	0.000525128	0.00162222	0.000160443	2.45714e-05	5.92619e-05	<DL	<DL
		Sort 11	lamb	black liver	ND	0.00305887	<DL	551.305	174.069	<DL	5230.63	2772.15	51.2967	<DL	0.252738	<DL	0.00755679	4.61027	64.0553	0.0421439	<DL	55.1943	29.5863	0.000679832	<DL	0.0922548	25.9275	0.121352	<DL	<DL	<DL	1.9976	<DL	<DL	0.402189	0.0668226	<DL	<DL	0.033154	0.147951	0.0057085	0.00596656	0.000539329	0.00175995	0.000137695	3.47754e-05	7.80483e-05	<DL	<DL
		Sort 12	lamb	black liver	29.3631	0.00544716	<DL	768.202	180.94	1.29059	4573.1	2758.4	50.4199	<DL	0.155135	0.000919515	<DL	3.70397	74.5926	0.0351225	<DL	25.7486	36.2124	0.000625793	0.00435388	0.0284525	10.944	0.117139	<DL	0.023446	<DL	1.05164	<DL	<DL	0.29658	0.212357	<DL	<DL	0.0415254	0.148114	0.00351663	0.00325379	0.000354243	0.00126889	9.3178e-05	1.83346e-05	4.83465e-05	<DL	<DL
		Sort 13A	lamb	black liver	32.2493	0.00487697	<DL	732.212	165.469	1.01064	4295.31	2640.18	42.0587	<DL	0.147476	<DL	0.0411495	3.16743	73.8691	0.0534823	0.0134209	7.86075	37.9168	0.000787747	<DL	0.0469004	10.9462	0.0903349	<DL	0.0197649	<DL	1.32536	<DL	<DL	0.0683958	0.0701763	<DL	<DL	0.022556	0.169076	0.0076602	0.00900311	0.00111545	0.00356696	0.000382869	4.17838e-05	0.000218926	1.44897e-05	5.01903e-05
		Sort 14	lamb	black liver	30.8781	0.0046213	<DL	699.549	161.316	0.998503	4301.46	2863.03	50.0817	<DL	0.146234	0.000695203	<DL	2.28444	82.0138	0.0666815	<DL	85.1004	33.1117	0.000540224	0.00425138	0.121066	16.3446	0.13863	<DL	<DL	<DL	1.64121	<DL	<DL	0.254795	0.111812	<DL	<DL	0.0317639	0.12834	0.00609682	0.00794214	0.000817006	0.00288741	0.000316384	3.40246e-05	0.000169376	<DL	3.51778e-05
		Sort 15	lamb	black liver	28.9332	0.00409263	<DL	771.938	161.24	1.04047	4242.82	2595.73	39.4785	<DL	0.16715	<DL	0.0371856	3.20812	125.619	0.0476461	0.0141917	70.3305	33.5781	0.000469026	0.0035839	0.155207	17.2318	0.174213	<DL	0.0243303	<DL	1.76785	<DL	<DL	0.396357	0.352243	<DL	0.000445369	0.0634021	0.159657	0.00590319	0.00419626	0.000556098	0.00181389	0.000162086	1.64159e-05	0.000106921	<DL	<DL
		Sort 16	sheep	black liver	30.6711	0.0042373	<DL	832.379	152.269	1.48303	4156.77	2730.66	43.6706	<DL	0.203789	<DL	0.0604989	2.49062	150.169	0.0597666	<DL	9.31203	31.9859	0.000546629	<DL	0.110251	6.95189	0.159636	<DL	0.0242325	<DL	1.78729	<DL	<DL	0.208788	0.296965	<DL	<DL	0.0256856	0.179858	0.00626689	0.00810869	0.00093081	0.00342511	0.000444268	9.61361e-05	0.000208335	2.19078e-05	9.33627e-05
		Sort 16	sheep	black liver	30.6711	0.00476557	<DL	762.751	158.297	1.65177	4329.39	2775.99	48.1038	<DL	0.217737	0.00065472	<DL	2.6023	144.76	0.0609439	<DL	11.0599	33.4003	0.000775696	0.00375269	0.111455	7.08676	0.166561	<DL	0.0286614	<DL	1.84745	<DL	<DL	0.271282	0.291214	<DL	<DL	0.0257427	0.204282	0.00687289	0.00847115	0.000938983	0.003481	0.000444629	7.20372e-05	0.000282287	2.6007e-05	6.93712e-05
		Sort 17	sheep	black liver	30.7528	0.00523325	<DL	810.617	158.351	1.3391	4175.6	2419.63	44.3062	<DL	0.223484	0.00166527	<DL	3.11657	164.298	0.0719101	<DL	78.2009	28.3892	0.00147989	0.00513196	0.182928	11.1484	0.115498	0.000458364	0.0193438	<DL	1.51666	<DL	<DL	1.13061	0.109932	<DL	<DL	0.0289723	0.247395	0.0271157	0.0355646	0.00376886	0.0129983	0.00148029	0.000217207	0.000779923	4.88072e-05	0.000174873
		Sort 18	sheep	black liver	30.4915	0.00541596	<DL	850.58	154.37	1.3367	3903.96	2570.06	50.9208	<DL	0.215811	0.00132353	0.00724952	4.28697	102.531	0.0767789	0.00988356	182.272	32.7898	0.00121589	0.00696431	0.595874	25.9519	0.170271	<DL	0.0227479	<DL	1.20129	<DL	<DL	3.35211	0.322695	<DL	<DL	0.231114	0.222728	0.0174174	0.022453	0.00264789	0.00896579	0.00109305	0.00015984	0.000565744	4.52277e-05	0.000135155
		Sort 19	sheep	black liver	31.6093	0.00327468	<DL	644.505	170.981	<DL	4593.7	2797.1	41.83	<DL	0.20429	<DL	<DL	3.62752	130.929	0.0880665	<DL	30.5225	34.1311	0.000706764	0.00433936	0.143629	14.0382	0.13086	<DL	<DL	<DL	1.46945	<DL	<DL	0.27341	0.3198	<DL	<DL	0.0324053	0.155907	0.00581454	0.00736525	0.00081559	0.00284102	0.000424726	6.41424e-05	0.000193367	1.24169e-05	5.53877e-05
		Sort 20	sheep	black liver	30.9119	0.00311721	<DL	774.173	166.22	<DL	4491.97	2585.01	40.8985	<DL	0.292517	0.00328661	0.0105497	2.04071	138.453	0.0802854	0.0126425	123.61	43.0941	0.00584895	0.0168801	0.503985	15.4008	0.192809	0.00214339	<DL	<DL	10.8334	<DL	<DL	1.90354	1.60145	0.00161642	<DL	0.0794241	0.191824	0.143663	0.172594	0.0211048	0.0719551	0.00781954	0.00114639	0.00370325	0.00025731	0.000752961
		Sort 21	sheep	black liver	ND	<DL	<DL	646.902	165.343	<DL	4508.17	2816.26	44.9823	<DL	0.184787	<DL	0.0331944	2.68311	158.995	0.0709892	0.00915393	27.2297	31.7823	0.000737228	0.00773349	0.236591	10.4336	0.0645403	0.000440459	<DL	<DL	0.938062	<DL	<DL	0.659907	0.325003	<DL	<DL	0.0209549	0.0713656	0.0187429	0.024535	0.00295403	0.00958579	0.00122482	0.00011573	0.00050748	4.51751e-05	0.00014453
		Sort K1	lamb	healty liver	ND	0.00843019	<DL	720.572	182.643	1.66576	4847.35	2844.5	46.2735	<DL	0.221901	<DL	0.035176	2.92137	66.2505	0.0680006	0.0250373	27.2034	36.4231	0.00100796	<DL	0.0995783	17	0.129497	<DL	0.0460377	<DL	1.20758	<DL	<DL	0.277585	0.115943	<DL	<DL	0.201569	0.0677194	0.00560081	0.00478653	0.000457391	0.00132919	0.000129093	1.89529e-05	4.42941e-05	1.30883e-05	<DL
		Sort K2	lamb	healty liver	ND	0.00500606	0.00142889	755.859	170.418	<DL	4412.33	2756.97	46.5184	<DL	0.195133	<DL	0.084527	3.017	89.6245	0.0671678	0.0157205	58.8987	36.6849	0.000718932	<DL	0.0772902	11.1637	0.146804	<DL	0.0240086	0.00215693	1.34395	<DL	0.00182666	0.221075	0.150669	<DL	<DL	0.139416	0.0776582	0.00512506	0.00429164	0.000441921	0.00127561	0.000161301	1.57641e-05	6.02691e-05	<DL	<DL
		Sort K3	lamb	healty liver	ND	0.00460736	<DL	646.601	174.008	0.860385	4756.11	2720.23	53.509	<DL	0.196386	0.00170672	<DL	3.2768	64.2107	0.102409	<DL	66.6772	34.9228	0.000576534	0.00898883	0.231032	8.71087	0.201309	<DL	0.0216747	<DL	0.832104	<DL	<DL	0.106149	0.0780973	<DL	<DL	0.111488	0.113826	0.00114865	0.000993949	0.000115037	0.000302069	3.60957e-05	<DL	<DL	<DL	<DL
		Sort K4	lamb	healty liver	ND	<DL	<DL	738.635	175.554	<DL	4738.45	2634.6	47.0027	<DL	0.210814	<DL	0.0477985	3.56721	81.7368	0.0933358	<DL	92.4888	31.4825	0.000622093	0.00765304	0.265423	8.40883	0.132312	<DL	<DL	0.000907414	0.975821	<DL	<DL	0.203287	0.10114	<DL	<DL	0.133867	0.0692474	0.00238606	0.00226364	0.000172009	0.000567999	3.089e-05	<DL	<DL	<DL	<DL
		Sort K5	lamb	healty liver	29.0053	0.00505669	<DL	744.453	154.705	1.11071	4074.81	2562.99	50.6802	<DL	0.114223	0.000727399	0.0134395	4.23179	114.65	0.031101	<DL	52.4487	35.1263	0.000436323	0.00347238	0.100418	7.94141	0.17452	<DL	0.0222109	<DL	1.2664	<DL	<DL	0.0128188	0.0199039	<DL	<DL	0.00946211	0.0819299	0.00807369	0.00821344	0.000948633	0.00283352	0.000301901	3.40475e-05	0.000155773	<DL	3.52528e-05
		Sort K6	lamb	healty liver	30.105	0.00485985	<DL	778.476	170.283	1.16264	4522.12	2890.08	49.5456	<DL	0.177304	0.00119574	<DL	3.87165	64.242	0.0432373	<DL	26.3005	30.6173	0.000591594	<DL	0.0312437	15.4749	0.171149	<DL	0.0255044	<DL	0.891291	<DL	<DL	0.0440992	0.208615	<DL	<DL	0.0407689	0.323189	0.00386904	0.00290174	0.000322931	0.000925732	9.8568e-05	1.84719e-05	6.40612e-05	<DL	1.61748e-05
		Sort K7	lamb	healty liver	29.4828	0.00336605	<DL	686.963	170.065	<DL	4640.75	2751.93	45.9385	<DL	0.202976	<DL	<DL	2.80026	72.8119	0.0375013	<DL	48.4351	30.9842	<DL	<DL	0.0515751	15.3585	0.116316	<DL	<DL	<DL	1.16992	<DL	<DL	0.390172	0.0552175	<DL	<DL	0.069447	0.147142	0.00231708	0.0025005	0.000277924	0.000849675	0.000106303	<DL	<DL	<DL	1.76869e-05
		Sort K8	lamb	healty liver	30.4319	<DL	<DL	583.035	179.878	<DL	4926.94	2832.46	51.0129	<DL	0.230707	<DL	<DL	2.98416	83.1141	0.0495617	<DL	53.2869	33.4366	<DL	<DL	0.0841922	17.7407	0.128662	<DL	<DL	<DL	1.15222	<DL	<DL	0.60536	0.195258	<DL	0.000646078	0.225928	0.0840993	0.00257833	0.00190865	0.00023993	0.000690222	7.97729e-05	<DL	<DL	<DL	<DL
		Sort K9	lamb	healty liver	32.1535	0.00364821	<DL	644.204	176.834	<DL	5097.41	2699.87	49.0934	<DL	0.232295	0.00169024	<DL	3.70792	82.2572	0.0323541	<DL	5.3185	30.1159	0.00054246	<DL	0.0206307	14.8777	0.118736	<DL	<DL	<DL	1.17113	<DL	<DL	0.00056667	0.054338	<DL	<DL	0.0281682	0.278828	0.00616985	0.00667288	0.000805187	0.00302012	0.0003131	7.09296e-05	0.000209136	1.8549e-05	4.50092e-05
		Sort K10	sheep	healty liver	32.124	0.0030047	<DL	766.83	169.73	0.951022	4641.07	2497.89	36.7792	<DL	0.236498	0.000803696	<DL	2.62266	47.1817	0.0806917	<DL	75.0298	38.6596	0.000553497	0.00463229	0.284817	25.1182	0.0830835	<DL	<DL	<DL	1.52634	<DL	<DL	0.639362	1.08748	<DL	<DL	0.296931	0.123125	0.00164283	0.00141259	0.000186126	0.000498018	8.44969e-05	<DL	<DL	<DL	<DL
		Sort extra	ID not recorded	black liver	ND	<DL	<DL	683.082	177.138	<DL	4781.24	2808.49	45.1921	<DL	0.171811	<DL	<DL	3.64933	138.988	0.0371889	<DL	16.9817	25.89	<DL	0.0031899	0.0355583	13.0804	0.069555	<DL	<DL	<DL	0.804529	<DL	<DL	0.205467	0.131663	<DL	<DL	0.0420692	0.0629006	0.00568921	0.00447097	0.000465798	0.00143735	0.000165348	2.64583e-05	<DL	<DL	<DL
		Sort extra	ID not recorded	black liver	ND	<DL	<DL	732.429	175.533	<DL	4650.25	2753.61	45.9896	<DL	0.170198	<DL	0.0537084	3.49479	143.243	0.03749	0.0252936	16.5606	26.112	<DL	0.00312883	0.0404309	12.7748	0.0730192	<DL	<DL	<DL	0.782546	<DL	<DL	0.199497	0.128057	<DL	<DL	0.041311	0.0737778	0.00558718	0.00446531	0.000480396	0.00141471	6.9538e-05	2.2912e-05	4.58155e-05	<DL	2.08356e-05
		Sort nyre 1	lamb! kidney?	black nyre	ND	<DL	<DL	668.16	164.607	<DL	3930.08	3197.61	61.4256	<DL	0.175926	<DL	0.0240051	4.85254	117.36	0.0388439	0.00962262	705.611	46.92	<DL	0.0244808	0.827384	28.4707	0.108495	<DL	<DL	<DL	0.657919	<DL	<DL	2.96099	0.306953	<DL	<DL	0.468053	0.130663	0.00485633	0.00528623	0.000483322	0.00123109	0.000101868	1.63498e-05	4.90446e-05	<DL	<DL
		Sort nyre 1	lamb! kidney?	black nyre	ND	<DL	<DL	649.333	162.973	<DL	3891.23	3150.98	62.3218	<DL	0.181855	<DL	0.0199019	4.82085	117.11	0.0380978	0.010533	693.404	46.6518	<DL	0.021016	0.823474	27.9628	0.112725	<DL	<DL	<DL	0.636377	<DL	<DL	2.95371	0.303956	<DL	<DL	0.46266	0.145164	0.00498241	0.00563845	0.000487241	0.00136656	0.00011933	3.17986e-05	7.37856e-05	<DL	<DL
		Certified Reference Material analyzed with the samples for QA/QC. Concentration in mg kg-1 dry weight.
		ID no.				Li	Be	Na	Mg	Al	P	K	Ca	Sc	Ti	V	Cr	Mn	Fe	Co	Ni	Cu	Zn	Ga	As	Se	Rb	Sr	Y	Zr	Nb	Mo	Ru	Pd	Ag	Cd	Sb	Te	Cs	Ba	La	Ce	Pr	Nd	Sm	Eu	Gd	Tb	Dy
		Dorm-4				1.08269	0.0227079	13705.3	886.452	1504.73	10903.8	12816.1	2240.84	0.138889	22.8811	1.59917	1.78086	3.08723	349.794	0.244254	1.27926	15.1182	51.268	0.424252	7.0119	3.79825	5.86399	9.4725	0.212322	0.119798	0.0610912	0.304173	<DL	0.000716673	0.00236043	0.338086	0.00689621	0.000427612	0.0823454	5.10556	0.631078	1.41795	0.166607	0.644499	0.129112	0.027884	0.101873	0.0135092	0.0664043
		Dorm-4				0.686138	0.0201481	12598.1	832.288	1320.45	10145.6	12197.1	2234.42	0.119095	19.7999	1.42915	1.86822	2.81909	305.285	0.218766	1.27189	12.7849	46.4912	0.373667	6.29634	3.64977	5.22666	8.29895	0.180706	0.035331	0.0529688	0.294522	<DL	0.000633505	0.00236764	0.304992	0.00595625	0.000964943	0.0679303	4.86665	0.54967	1.24397	0.14378	0.56271	0.107815	0.0243133	0.0886211	0.0119924	0.059091
		Certificate mean				ND	ND	ND	ND	ND	ND	ND	ND	ND	ND	ND	1.87	ND	341	ND	1.36	15.9	52.2	ND	6.8	3.56	ND	ND	ND	ND	ND	ND	ND	ND	ND	0.306	ND	ND	ND	ND	ND	ND	ND	ND	ND	ND	ND	ND	ND
		Certificate uncertainty (2 SD)				ND	ND	ND	ND	ND	ND	ND	ND	ND	ND	ND	0.16	ND	27	ND	0.22	0.9	3.2	ND	0.64	0.34	ND	ND	ND	ND	ND	ND	ND	ND	ND	0.015	ND	ND	ND	ND	ND	ND	ND	ND	ND	ND	ND	ND	ND
		Dolt-5				0.0697099	<DL	9894.72	895.665	16.9117	14351.6	14379.2	522.832	0.00420276	1.28937	0.390437	2.0875	8.59951	1014.85	0.239931	1.66948	33.2426	105.258	0.00686303	32.7021	8.52716	4.86523	3.39006	0.0165378	0.058639	0.00240451	1.43903	5.60466e-05	0.000204851	1.86223	14.7666	0.0091321	0.0026681	0.0661033	0.119403	0.0200147	0.0359165	0.00460093	0.0192029	0.00340466	0.000759047	0.00408648	0.00046757	0.00289894
		Certificate mean				ND	ND	9900	940	(31.7)	(11500)	14400	550	ND	ND	0.51	(2.35)	(8.91)	1070	0.267	(1.71)	35	105.3	ND	34.6	8.3	ND	3.73	ND	ND	ND	1.41	ND	ND	2.05	14.5	(0.013)	ND	ND	ND	ND	ND	ND	ND	ND	ND	ND	ND	ND
		Certificate uncertainty (2 SD)				ND	ND	1600	100	(4.2)	ND	3000	80	ND	ND	0.06	(0.58)	(0.70)	80	0.026	(0.56)	2.4	5.4	ND	2.4	1.8	ND	0.26	ND	ND	ND	0.22	ND	ND	0.08	0.6	0.036	ND	ND	ND	ND	ND	ND	ND	ND	ND	ND	ND	ND
[truncated: 17 more columns]
