# Supplementary material for: Public concerns over presumed metal and radionuclide pollution: testing a possible link to ovine hepatic melanosis in South Greenland
Source: Environ Monit Assess. 2026 Jan 22;198(2):161. doi: 10.1007/s10661-025-14945-z (PMC12823691; doi:10.1007/s10661-025-14945-z)
Supplement: Supplementary file 2 — (XLSX 12.6 KB) [file 10661_2025_14945_MOESM2_ESM.xlsx]

## Sheet: Sheet1
		Case Vs Control (all IDs)				Case Vs Control (excluding 3 IDs)				Sheep Vs Lamb (all IDs)
	Blood parameter	t-value	df	p-value	test	t-value	df	p-value	test	t-value	df	p-value	test
	Alb	-1.1185	29	0.2725	Student's t-test	-1.5828	26	0.1256	Student's t-test	0.32902	29	0.7445	Student's t-test
	ALP_2c	-1.0881	21.903	0.2884	Welch t-statistic	-1.1602	21.047	0.259	Welch t-statistic	-2.0039	24.449	0.05628	Welch t-statistic
	ALT	-0.19865	29	0.8439	Student's t-test	-0.73072	26	0.4715	Student's t-test	2.801	6.6342	0.028	Welch t-statistic
	AST	-0.041488	29	0.9672	Student's t-test	-0.52899	25.762	0.6013	Welch t-statistic	2.4597	6.1881	0.04793	Welch t-statistic
	Ca	-0.74885	29	0.46	Student's t-test	-0.53293	26	0.5986	Student's t-test	-1.7661	29	0.08791	Student's t-test
	Chol_2	-2.0827	29	0.04621	Student's t-test	-3.1052	25.712	0.004589	Welch t-statistic	4.0953	29	0.0003087	Student's t-test
	CK_L	0.21145	29	0.834	Student's t-test	0.41062	26	0.6847	Student's t-test	3.0153	29	0.005293	Student's t-test
	ECre_2	-0.82749	29	0.4147	Student's t-test	-1.1629	26	0.2554	Student's t-test	5.1055	29	1.892e-05	Student's t-test
	GGT	0.37666	10.848	0.7137	Welch t-statistic	-0.30589	26	0.7621	Student's t-test	1.4704	6.6308	0.1872	Welch t-statistic
	IP	-0.67501	29	0.505	Student's t-test	-1.4837	26	0.1499	Student's t-test	1.7477	29	0.0911	Student's t-test
	Iron_2	0.30402	29	0.7633	Student's t-test	0.37316	26	0.7121	Student's t-test	-3.2843	29	0.002673	Student's t-test
	Mg	-1.0537	29	0.3007	Student's t-test	-1.1683	26	0.2533	Student's t-test	0.4255	27	0.6738	Welch t-statistic
	TP	-1.1819	29	0.2468	Student's t-test	-1.8864	26	0.07046	Student's t-test	2.7902	29	0.009215	Student's t-test
	UN_c	0.36753	29	0.7159	Student's t-test	-0.37326	26	0.712	Student's t-test	1.0149	29	0.3186	Student's t-test
	NA	-2.1239	29	0.04233	Student's t-test	-2.2758	26	0.03134	Student's t-test	1.8385	24.046	0.07838	Welch t-statistic
	K	0.48938	29	0.6283	Student's t-test	0.1883	26	0.8521	Student's t-test	0.15728	29	0.8761	Student's t-test
	H	-0.70621	29	0.4857	Student's t-test	-1.5826	26	0.1256	Welch t-statistic	0.76642	29	0.4496	Student's t-test
	Student's t-test = equal variances between groups (p>0.05 in Fisher's F-test)
	Welch t-statistic = unequal variances between groups (p<0.05 in Fisher's F-test)
